# Supplementary material for: Public perception of cold weather events as evidence for and against climate change
Source: Springer Nature journal article supplement (doi:10.1007/s10584-013-1003-1), 2014-01-07
Supplement: MOESM5 [file 10584_2013_1003_MOESM5_ESM.docx]

**Figure S2
Self-reported reasons for changes in views**

*I have personally seen a difference in the weather patterns changing which means it appears to be a real issue.*

*There is increasing evidence that people are experiencing adverse weather conditions - the sunny Whitsuntides I recall in the 50's and 60's no longer seem to happen and winters seem longer, colder, wetter and windy.*

*I have become less sceptical as a result of the apparent increase in extreme weather conditions.*

*I am seeing the difference in the weather... I can see the damage of the changing weather.*

*Before I wasn’t too sure as the evidence wasn’t right in front of our own eyes literally - recently with all the weather changes etc. I have begun to believe in it much more solidly...*

*I have... lived long enough to have noticed changes in the weather in the UK that have occurred in quite a short period of time, this is something that my parents have also noticed and we often talk about it.*
